# Supplementary material
Source: PubMed Central journal article supplement (PMC3220561)
Supplement: supp_M111.305326_jbc.M111.305326-1.pdf [file supp_M111.305326_jbc.M111.305326-1.pdf]

Supplementary Table 1: Results of SB-04 Alanine Scan

|         | FPA <sup>(A)</sup><br>(IC <sub>50</sub> $\mu$ M) | NMR <sup>(B)</sup> |
|---------|--------------------------------------------------|--------------------|
| N1A     | >75                                              | NB                 |
| E2A     | 41 $\pm$ 8                                       | Weak               |
| T3A     | 20 $\pm$ 1.9                                     | Bound              |
| V4A     | >75                                              | NB                 |
| E5A     | 15.0 $\pm$ 1.6                                   | NB                 |
| L6A     | 30 $\pm$ 6                                       | Weak               |
| M7A     | >75                                              | NB                 |
| Q8A     | 13.7 $\pm$ 1.5                                   | Weak               |
| A9 (WT) | 8.0 $\pm$ 1.1                                    | Bound              |
| Y10A    | >75                                              | Weak               |
| L11A    | >75                                              | NB                 |
| H12A    | 8.0 $\pm$ 1.1                                    | Not Soluble*       |

<sup>(A)</sup> FPA analysis performed using GST-mMcl-1

<sup>(B)</sup> For classification NB  $\equiv \delta\Delta < 0.1$  ppm at a 10:1 peptide:protein ratio; Weak  $\equiv \delta\Delta 0.1 - 0.25$  ppm and Bound  $\equiv \delta\Delta > 0.25$  ppm

\* Not soluble at 200 nM in NMR buffer

Supplementary Table 2: rBH3 Containing Proteins

| Protein Name                             | UniProt ID | rBH3 sequence                |
|------------------------------------------|------------|------------------------------|
| SB-03                                    |            | NETVNTMLTYYY                 |
| Glucokinase                              | P35557     | NDTVATMISCYY                 |
| MAP2KS                                   | Q13163     | DEEMKAMLSYYY                 |
| Hexokinase I                             | P19367     | NDTVGTMMTCGY                 |
| Hexokinase II                            | P52789     | NDTVGTMMTCGY                 |
| Hexokinase III                           | P52790     | NDTVGTMMGCEP                 |
| Putative Hexokinase<br>HKDC1             | Q2TB90     | NDTVGTMMTCAY<br>NDTVGTMMTCGY |
| PTBP1                                    | P26599     | EAAANTMVNYYT                 |
| Glycogen phosphorylase                   | P06737     | NNTVNTMRLWSA                 |
| GREB1 like protein                       | Q9C091     | RETVSIMLTKYA                 |
| SB-04                                    |            | NETVELMQAYLH                 |
| UBCP1                                    | Q8WVY7     | ETGVELMRPYLH                 |
| Dynein heavy chain 8                     | Q96JB1     | EETVELLQPYFN                 |
| Cyclin dependent kinase 4<br>inhibitor C | P42773     | NEVVSLMQANGA                 |
| Alcohol dehydrogenase 6                  | P28332     | NEAVELMKTGKW                 |
| ATP Synthase Subunit A                   | B2XEH8     | EIAVALMQAYVF                 |
| P73                                      | O15350     | KESLELMELVPQ                 |
| UNC13C                                   | Q8NB66     | TETDEQMAYDH                  |
| Ras-GEF1                                 | Q13972     | TEHEALMQKYLH                 |
